# Supplementary material for: Effect of depth of discharge (DOD) on cycling in situ formed Li anodes
Source: Royal Society of Chemistry journal article supplement (doi:10.1039/d3fd00079f), 2023-05-31
Supplement: d3fd00079f1.pdf [file d3fd00079f1.pdf]

Supplementary Information

**Effect of depth of discharge (DOD) on cycling *in situ* formed Li anodes**

Kiwoong Lee and Jeff Sakamoto

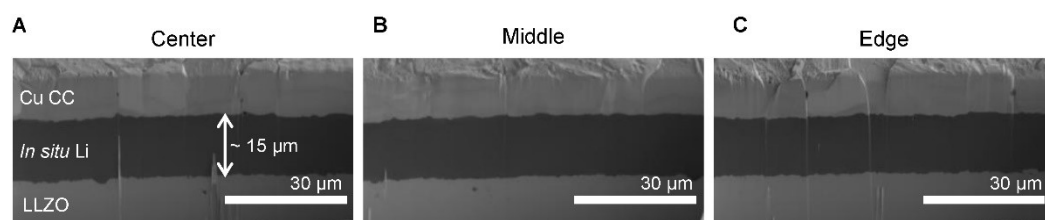

**Figure S1. *In situ* Li layer after *in situ* plating.**

SEM images of *in situ* Li/LLZO interfaces after *in situ* plating of  $3 \text{ mAh cm}^{-2}$  at (A) the center, (B) the middle and (C) the edge of the electrode.

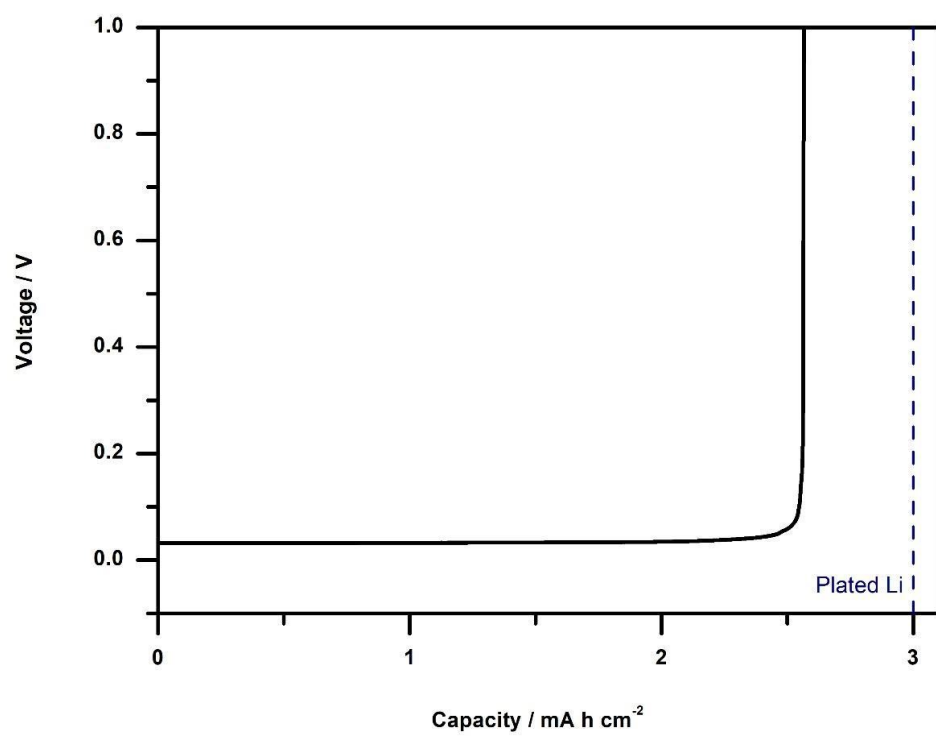

**Figure S2. Voltage profile of unidirectional stripping.**

3 mAh cm<sup>-2</sup> of *in situ* Li was unidirectionally stripped at 0.75 mA cm<sup>-2</sup>, 4.2 MPa and 60 °C.

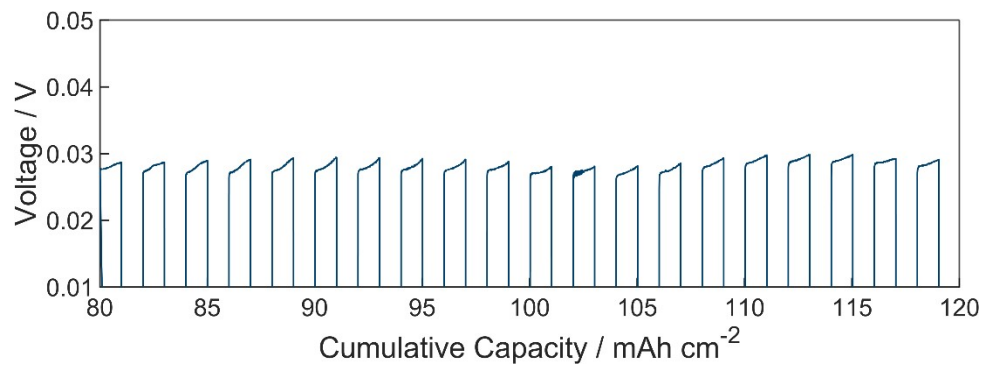

**Figure S3. Magnified view of the voltage profile in Figure 2A.**

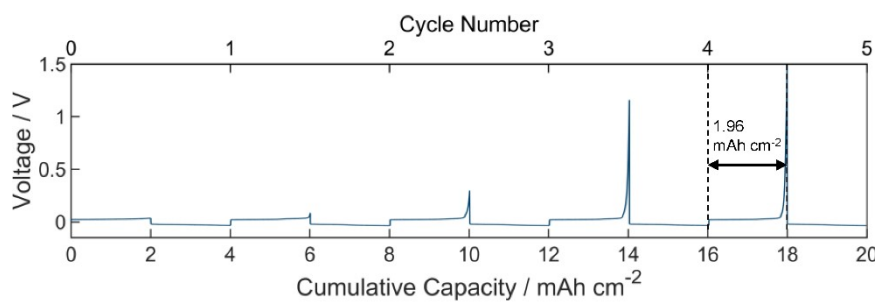

**Figure S4. Voltage profile of the cell cycling at a DOD of 66% for Figure 4 D-F.**

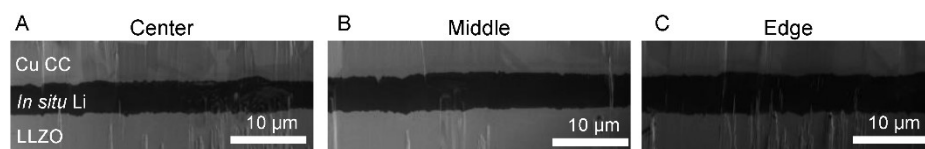

**Figure S5. Li/LLZO interfaces after the first stripping half-cycle at a DOD of 66%.**

Cross-sectional images of Li/LLZO interfaces at the (A) center, (B) middle and (C) edge of the electrode after stripping  $2 \text{ mAh cm}^{-2}$  out of total capacity of  $3 \text{ mAh cm}^{-2}$ .

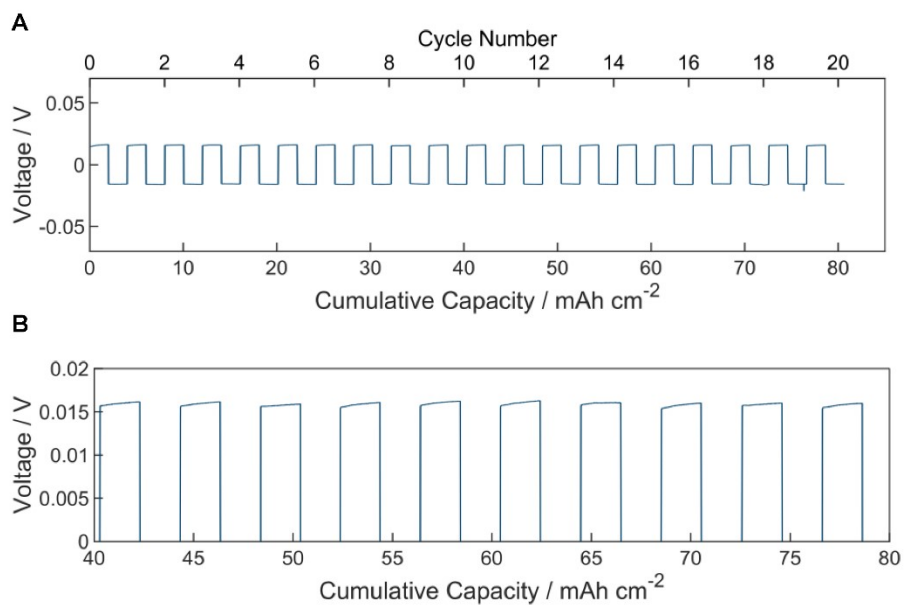

**Figure S6. Cycling thick Li foil**

(A) Voltage profile of cycling thick Li foil with a cycling capacity of 2 mAh cm<sup>-2</sup> and a current density of 0.75 mA cm<sup>-2</sup>. (B) Magnified view of (A).

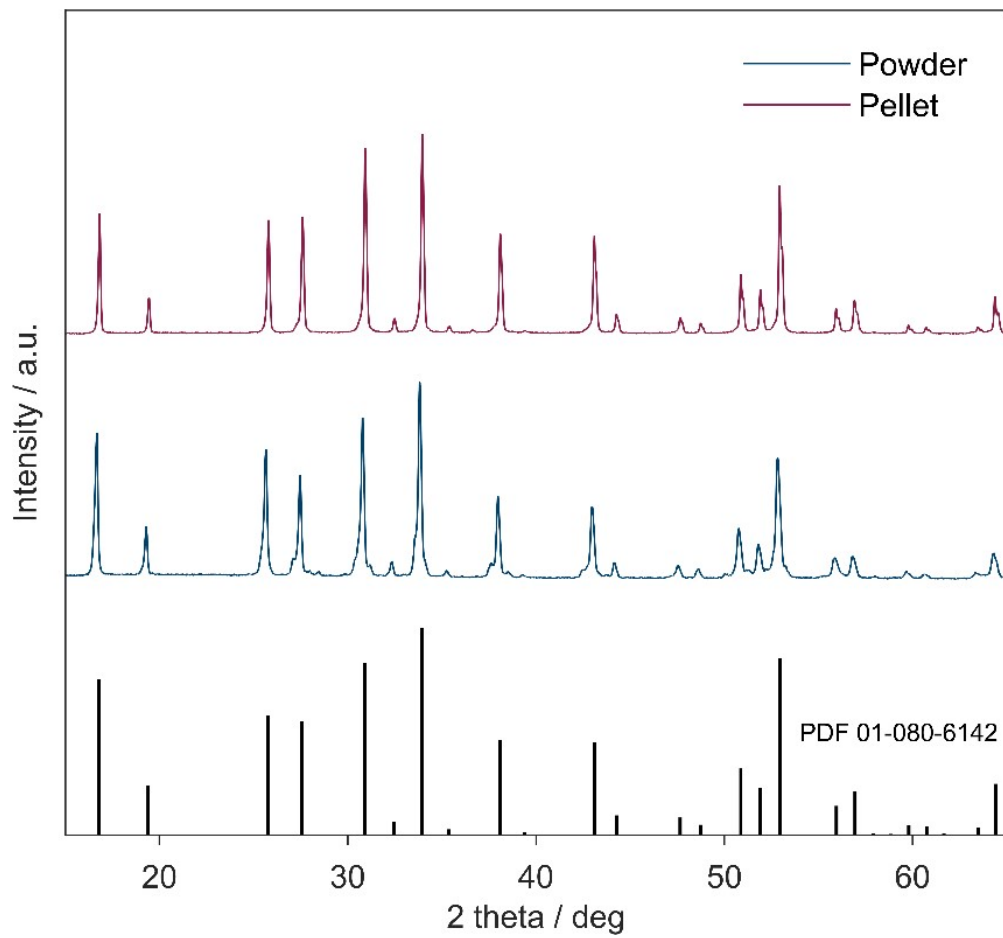

**Figure S7. X-ray diffraction (XRD) spectra of Ta-doped LLZO powder (blue) and a hot-pressed pellet (red).**
